# Supplementary material
Source: PubMed Central journal article supplement (PMC3947205)

SUPPLEMENTAL MATERIAL

## Supplemental Tables

**Table 1.** Patient characteristics of those included and excluded from the study

| Variable                                 | Excluded from cohort | Included in cohort | p-value <sup>  </sup> |
|------------------------------------------|----------------------|--------------------|-----------------------|
|                                          | N(%) or Mean (STD)   | N(%) or Mean (STD) |                       |
|                                          | or Median (p5,p95)   | or Median (p5,p95) |                       |
|                                          | (N=1819)             | (N=2413)           |                       |
| Age at first discharge diagnosis for HF* | 77.6 (12.8)          | 73.3 (11.1)        | <0.0001               |
| Female sex                               | 1063 (58.4%)         | 1210 (50.1%)       | <0.0001               |
| Race/ethnicity                           |                      |                    |                       |
| White                                    | 601 (33%)            | 1002 (41.5%)       | <0.0001               |
| Non-White or Hispanic                    | 81 (4.5%)            | 247 (10.2%)        | <0.0001               |
| Unknown                                  | 1137 (62.5%)         | 1164 (48.2%)       | <0.0001               |
| Socio-economic status                    |                      |                    |                       |
| Above poverty                            | 1210 (66.5%)         | 1818 (75.3%)       | <0.0001               |
| Below poverty                            | 298 (16.4%)          | 463 (19.2%)        | <0.0001               |
| Unknown                                  | 311 (17.1%)          | 132 (5.5%)         | <0.0001               |
| Charlson comorbidity index <sup>†</sup>  | 2 (0,7)              | 2 (0,6)            | <0.0001               |
| Cerebrovascular disease                  | 375 (20.6%)          | 555 (23%)          | 0.0636                |
| Chronic pulmonary disease                | 1143 (62.8%)         | 1712 (70.9%)       | <0.0001               |
| Dementia                                 | 135 (7.4%)           | 76 (3.1%)          | <0.0001               |
| Diabetes                                 | 679 (37.3%)          | 1096 (45.4%)       | <0.0001               |
| Diabetes with chronic complications      | 391 (21.5%)          | 727 (30.1%)        | <0.0001               |
| Hemiplegia or paraplegia                 | 44 (2.4%)            | 54 (2.2%)          | 0.6983                |
| Hypertension                             | 1568 (86.2%)         | 2111 (87.5%)       | 0.2201                |

|                                                            |                  |                |         |
|------------------------------------------------------------|------------------|----------------|---------|
| Malignancy, including leukemia and lymphoma                | 282 (15.5%)      | 370 (15.3%)    | 0.8799  |
| Metastatic solid tumor                                     | 89 (4.9%)        | 85 (3.5%)      | 0.0263  |
| Mild liver disease                                         | 80 (4.4%)        | 119 (4.9%)     | 0.4169  |
| Myocardial infarction                                      | 535 (29.4%)      | 872 (36.1%)    | <0.0001 |
| Peptic ulcer disease                                       | 103 (5.7%)       | 174 (7.2%)     | 0.0438  |
| Peripheral vascular disorder                               | 364 (20%)        | 630 (26.1%)    | <0.0001 |
| Renal disease                                              | 567 (31.2%)      | 817 (33.9%)    | 0.0651  |
| Rheumatologic disease                                      | 111 (6.1%)       | 165 (6.8%)     | 0.3373  |
| Valvular heart disease                                     | 665 (36.6%)      | 1247 (51.7%)   | <0.0001 |
| Median number of ambulatory encounters per patient         | 58 (10, 205)     | 100 (25, 289)  | <0.0001 |
| Median number of inpatient encounters per patient          | 5 (1, 20)        | 9 (2, 30)      | <0.0001 |
| LVEF <sup>#</sup>                                          |                  |                | 0.6855  |
| HFPEF <sup>‡</sup>                                         | 978/1477 (66.2%) | 1613 (66.8%)   |         |
| HFRF <sup>§</sup>                                          | 499/1477 (33.8%) | 800 (33.2%)    |         |
| No LVEF Measurements                                       | 342 (18.8%)      | --             | --      |
| Mortality                                                  | 1113 (61.2%)     | 1204 (49.9%)   | <0.0001 |
| Median time to death from first discharge diagnosis for HF | 194 (5, 1831)    | 545 (12, 2076) | <0.0001 |

---

\* Heart failure

† Modified CCI does not include CHF, hypertension, MI, renal disease, or valvular heart disease.

All other components of the modified CCI are listed, with the exception of AIDS and moderate/severe liver disease due to fewer than 5 patients having these conditions.

‡ Heart failure preserved ejection fraction

§ Heart failure reduced ejection fraction

| | T-test, Chi-square, Mantel-Haenszel Chi-Square, or Wilcoxon Rank Sum as appropriate.

# Left ventricular ejection fraction

**Table 2.** Parametric survival analyses parameter estimates, modeling transition from alive to death

|                                           | Exponential/MSM<br>(95% CI) | Weibull<br>(95% CI) | Gamma<br>(95% CI) |
|-------------------------------------------|-----------------------------|---------------------|-------------------|
| -2LL                                      | 4714.88                     | 4281.16             | 4267.96           |
| AIC                                       | 4734.88                     | 4303.16             | 4291.96           |
| Gender (Male referent)                    | 0.91 (0.81, 1.03)           | 0.94 (0.89, 1.01)   | 0.95 (0.89, 1.00) |
| Age                                       | 1.04 (1.03, 1.04)           | 1.02 (1.02, 1.03)   | 1.02 (1.02, 1.02) |
| Charlson comorbidity index                | 1.05 (1.02, 1.08)           | 1.03 (1.01, 1.05)   | 1.03 (1.02, 1.04) |
| Hypertension                              | 1.39 (1.15, 1.67)           | 1.28 (1.16, 1.42)   | 1.26 (1.15, 1.39) |
| Myocardial infarction                     | 0.93 (0.83, 1.05)           | 0.97 (0.91, 1.04)   | 0.97 (0.92, 1.03) |
| Renal disease                             | 0.89 (0.79, 1.01)           | 0.95 (0.89, 1.02)   | 0.95 (0.90, 1.01) |
| Valvular heart disease                    | 0.98 (0.87, 1.09)           | 0.99 (0.93, 1.06)   | 0.98 (0.93, 1.04) |
| SES <sup>†</sup> (Above poverty referent) |                             |                     |                   |
| Below poverty                             | 0.88 (0.76, 1.03)           | 0.93 (0.85, 1.01)   | 0.94 (0.87, 1.02) |
| Unknown SES                               | 0.80 (0.60, 1.07)           | 0.92 (0.78, 1.08)   | 0.92 (0.79, 1.08) |

\* $\beta$ -blockers omitted from parametric survival analyses.

<sup>†</sup>Socioeconomic status - below poverty if patient resided in area with more than 20% of housing in poverty, or if less than 25% of residents had a high school education.

**Table 3.** Cox proportional hazards survival analysis vs. Multi-state Markov model (MSM), modeling the HFREF to death transition

|                                                | Cox PH HR<br>(95% CI) | 2 state MSM<br>(95% CI) | Full MSM Model<br>(95% CI) |
|------------------------------------------------|-----------------------|-------------------------|----------------------------|
| Gender (Male referent)                         | 0.93 (0.81, 1.07)     | 0.91 (0.75, 1.11)       | 1.01 (0.80, 1.26)          |
| Age (per 10 year increase)                     | 1.84 (1.69, 1.99)     | 1.63 (1.48, 1.79)       | 1.64 (1.46, 1.84)          |
| Charlson comorbidity index                     | 1.08 (1.05, 1.12)     | 1.09 (1.03, 1.14)       | 1.09 (1.03, 1.15)          |
| Hypertension                                   | 1.03 (0.85, 1.25)     | 0.95 (0.73, 1.24)       | 0.99 (0.74, 1.33)          |
| Myocardial infarction                          | 1.00 (0.87, 1.14)     | 0.98 (0.81, 1.19)       | 0.96 (0.77, 1.20)          |
| Renal disease                                  | 1.31 (1.14, 1.51)     | 1.20 (0.98, 1.47)       | 1.32 (1.06, 1.65)          |
| Valvular heart Disease                         | 1.00 (0.88, 1.14)     | 1.03 (0.86, 1.25)       | 1.04 (0.85, 1.28)          |
| Past HF history (No HFREF referent)            |                       |                         |                            |
| Has had HFREF in past                          | 0.76 (0.64, 0.89)     | 1.16 (0.91, 1.47)       | 0.65 (0.44, 0.96)          |
| Has not had any prior assessment               | --                    | --                      | --                         |
| *SES (Above poverty referent)                  |                       |                         |                            |
| Below poverty                                  | 1.01 (0.85, 1.19)     | 0.91 (0.71, 1.16)       | 0.93 (0.72, 1.20)          |
| Unknown                                        | 0.86 (0.61, 1.21)     | 0.83 (0.52, 1.33)       | 0.81 (0.48, 1.36)          |
| Adherence (Not adherent, †PDC < 0.80 referent) |                       |                         |                            |
| Adherent (PDC ≥ 0.80)                          | 0.94 (0.80, 1.11)     | 0.69 (0.54, 0.87)       | 0.68 (0.54, 0.85)          |

Not prescribed  $\beta$ -blocker    0.62 (0.51, 0.76)    1.09 (1.03, 1.14)    1.34 (1.01, 1.77)

---

\*Socioeconomic status - below poverty if patient resided in area with more than 20% of housing in poverty, or if less than 25% of residents had a high school education.

†Percent days covered for  $\beta$ -blockers – adherent if PDC was  $\geq$  80%, and non-adherent if PDC < 80%.

## Figures

**Figure 1: Survival plots for transition from heart failure reduced ejection fraction (HFREF) to death:** Unadjusted Kaplan-Meier, Cox proportional hazards, and multi-state Markov model (MSM) adjusted for all covariates.

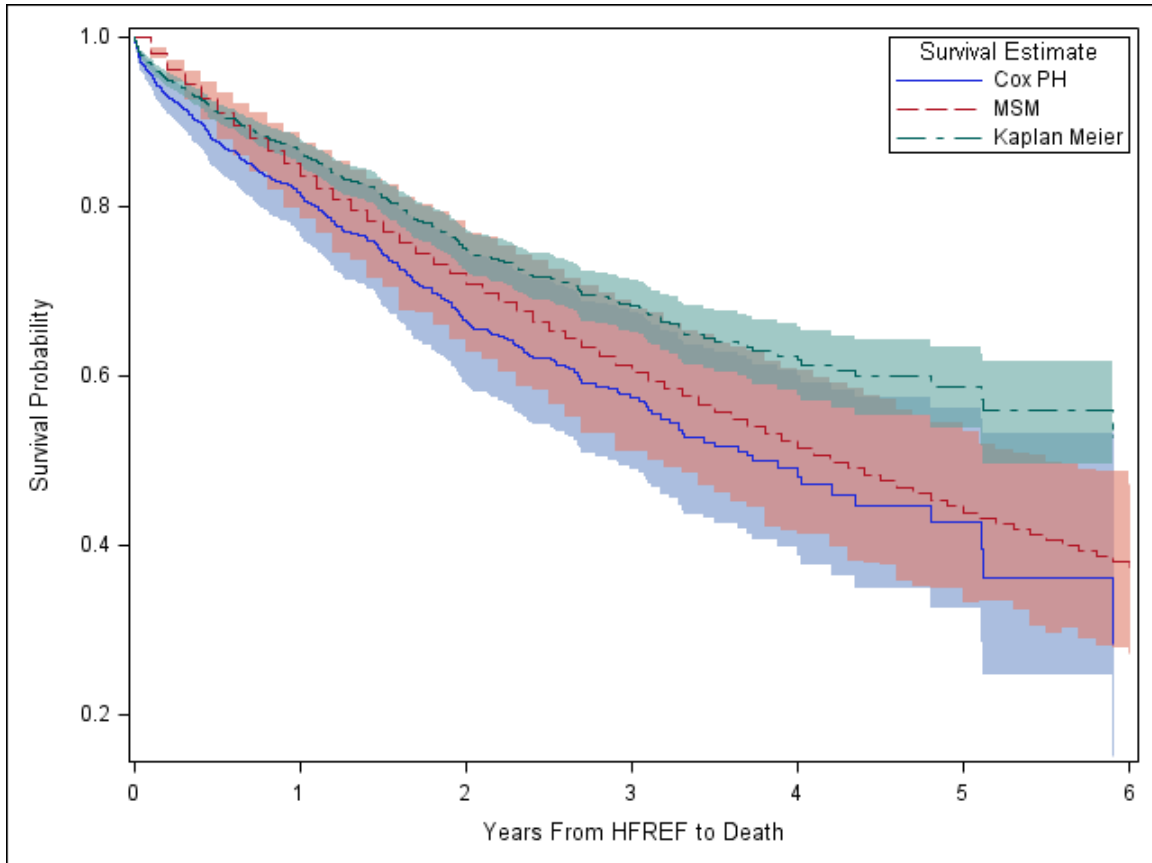

Supplement: NIHMS539424-supplement-Supplementary_Data.pdf [file NIHMS539424-supplement-Supplementary_Data.pdf]
